# Supplementary material for: Improvement of the energy storage performance of antiferroelectric Pb,La(Zr,Ti)O3 thin films by the LaNiO3 buffer layer on the metal electrode
Source: Royal Society of Chemistry journal article supplement (doi:10.1039/d4tc01731e), 2024-01-01
Supplement: d4tc01731e1.pdf [file d4tc01731e1.pdf]

## Supporting Information

### **Improvement of the energy storage performance of antiferroelectric Pb,La(Zr,Ti)O<sub>3</sub> thin films by the LaNiO<sub>3</sub> buffer layer on metal electrode**

Zixin Cao,<sup>a</sup> Yawei Li,<sup>a,†</sup> Liyan Shang,<sup>a,†</sup> Kai Jiang,<sup>a,b</sup> Liangqing Zhu,<sup>a</sup> and Zhigao Hu<sup>a,c</sup>

<sup>a</sup> Technical Center for Multifunctional Magneto-Optical Spectroscopy (Shanghai), Engineering Research Center of Nanophotonics and Advanced Instrument (Ministry of Education), Department of Physics, School of Physics and Electronic Science, East China Normal University, Shanghai, China.

<sup>b</sup> School of Arts and Sciences, Shanghai Dianji University, Shanghai 200240, China

<sup>c</sup> Collaborative Innovation Center of Extreme Optics, Shanxi University, Taiyuan, China.

<sup>†</sup> The corresponding authors. [ywli@ee.ecnu.edu.cn](mailto:ywli@ee.ecnu.edu.cn); [lyshang@ee.ecnu.edu.cn](mailto:lyshang@ee.ecnu.edu.cn)

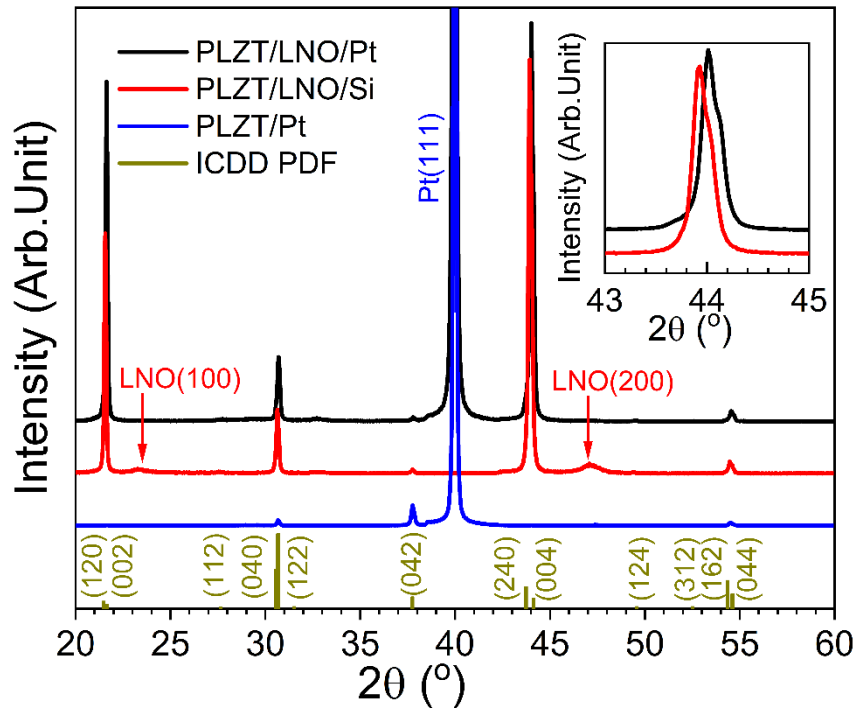

**Figure S1.** XRD patterns of the PLZT films on Pt, LNO/Si and LNO/Pt.

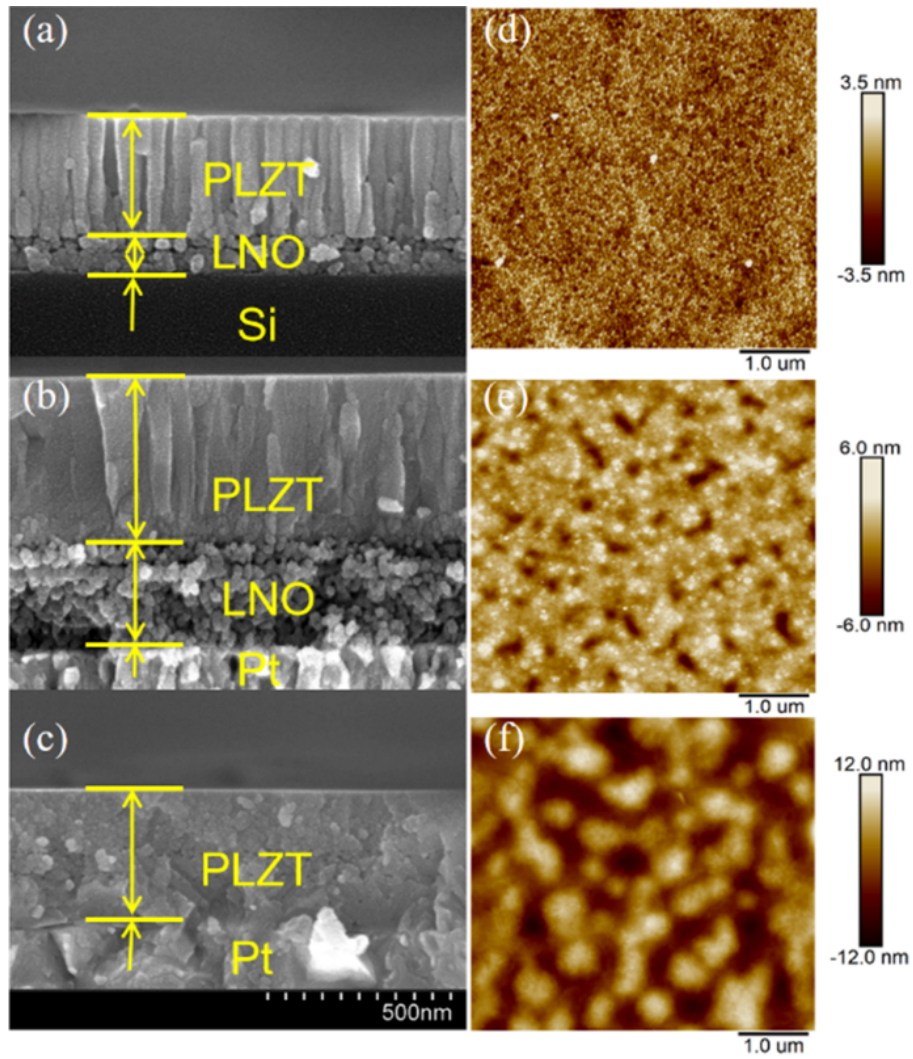

**Figure S2.** Cross-sectional SEM images of (a) PLZT/LNO/Si, (b) PLZT/LNO/Pt, (c) PZLT/Pt and the surface AFM images of (d) PLZT/LNO/Si, (e) PLZT/LNO/Pt, (f) PZLT/Pt.

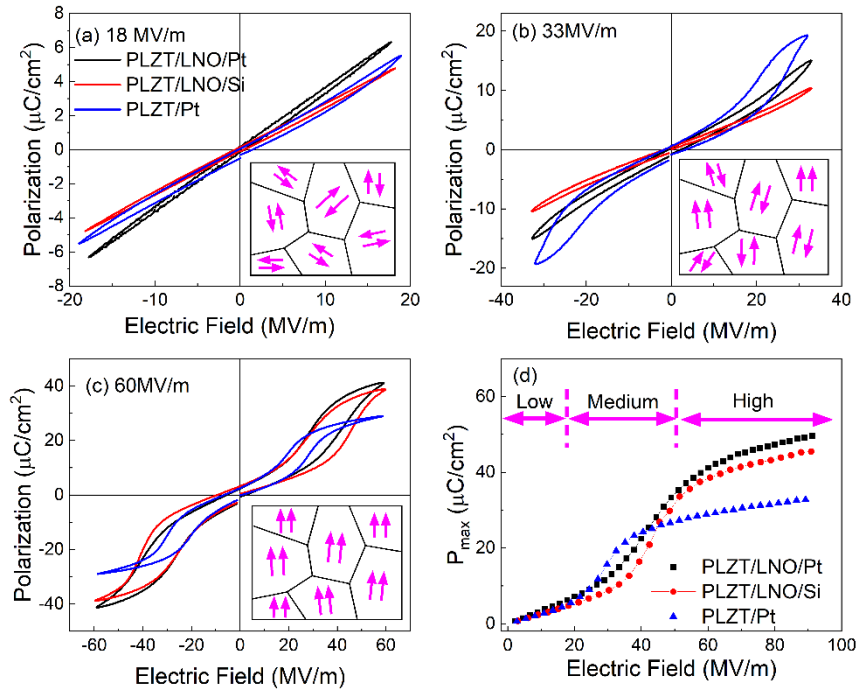

**Figure S3.** P-E loops of the PLZT films on Pt, LNO/Si, and LNO/Pt at the electric fields of (a) 18 MV/m, (b) 33 MV/m, and (c) 60 MV/m. (d) the electric field dependence of  $P_{\text{max}}$ . Insets in (a), (b) and (c) are the illustrations of the polarization arrangement.

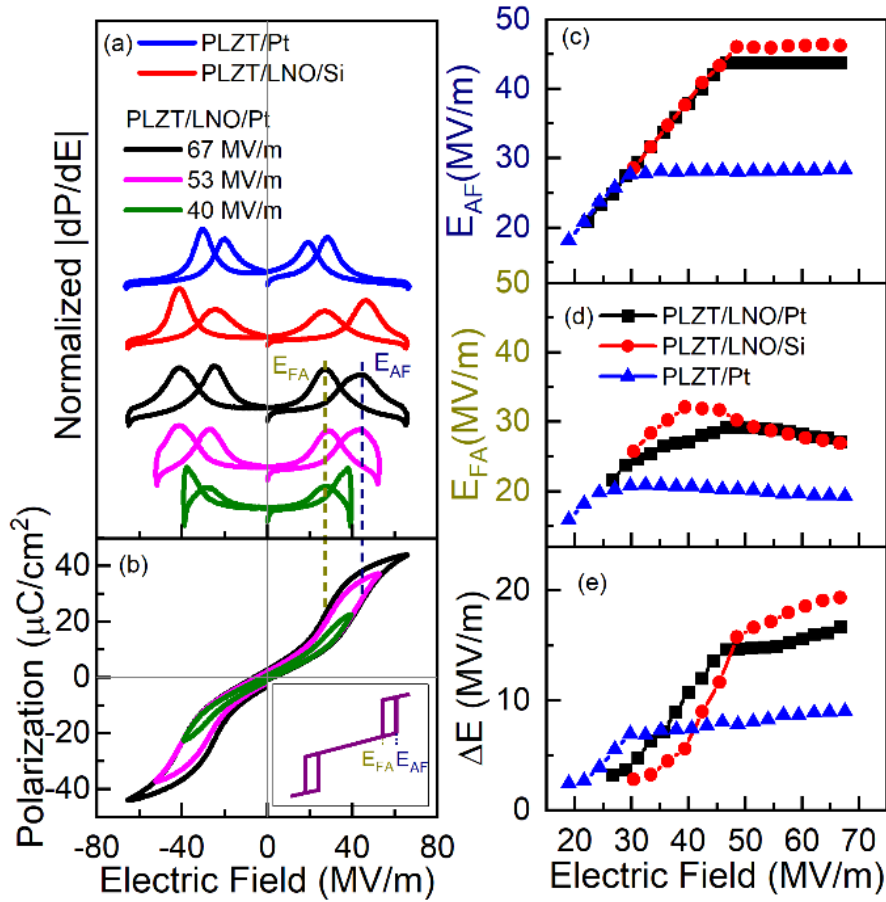

**Figure S4.** (a) Curves of normalized  $|dP/dE|$  vs. electric field of the PLZT films on different substrates and those of the PLZT film on LNO/Pt at different electric field. (b) P-E loops of the PLZT film on LNO/Pt at different electric field. Inset: the schematic diagram of P-E loop of AFE and the positions of  $E_{FA}$  and  $E_{AF}$ . The electric field dependence of (c)  $E_{AF}$  (d)  $E_{FA}$ , and (e)  $\Delta E$ .

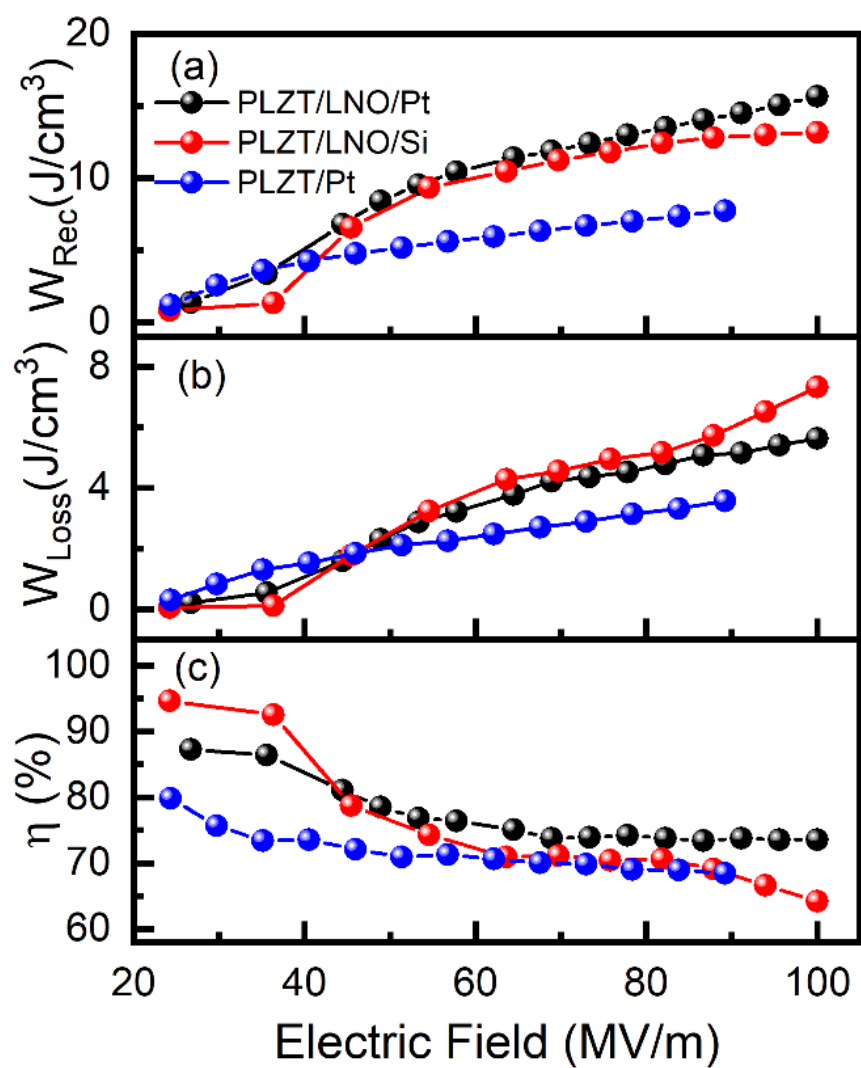

**Figure S5.** The electric field dependence of (a)  $W_{Rec}$ , (b)  $W_{Loss}$  and (c)  $\eta$  of the PLZT thin films.

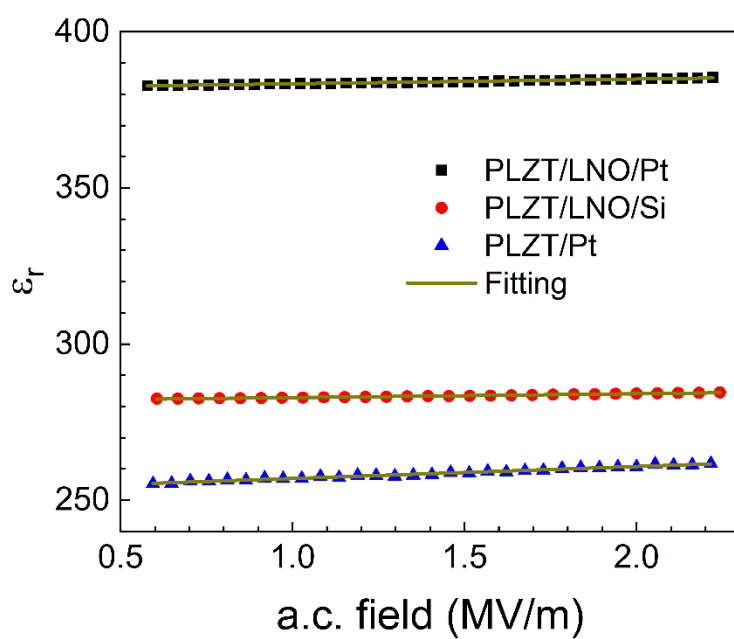

**Figure S6.** The a.c. field dependence of the permittivity of the PLZT films.
